**Title.**

Age of menopause and dementia risk in 10,832 women from the Swedish Twin Registry

**Author names.**

Ursula G. Saelzler<sup>a</sup>, Erin E. Sundermann<sup>a</sup>, Janelle T. Foret, Margaret Gatz<sup>b</sup>, Ida K. Karlsson<sup>c</sup>, & Matthew S. Panizzon<sup>a,d</sup>

**Author affiliations.**

<sup>a</sup>Department of Psychiatry, University of California San Diego  
3120 Biomedical Sciences Wy, La Jolla, CA92093

<sup>b</sup>Center for Economic and Social Research, University of Southern California  
635 Downey Way, Los Angeles, CA 90089

<sup>c</sup>Department of Medical Epidemiology and Biostatistics, Karolinska Institutet,  
171 77 Solna, Sweden

<sup>d</sup>Center for Behavior Genetics of Aging, University of California San Diego  
9500 Gilman Dr. La Jolla CA 92093 La Jolla, CA92093

Abstract

**INTRODUCTION:** An earlier age of menopause (AOM) is hypothesized to increase vulnerability to the neuropathological processes of dementia which begin in midlife.

**METHODS:** We tested this hypothesis in a sample of 10,832 women from the Swedish Twin Registry, stratified by menopause etiology. Survival models showed that a U-shaped association was present for women whose menopause occurred spontaneously. Sensitivity analyses conducted in hormone naïve, *APOE*  $\epsilon$ 4+ and AOM restricted subsamples showed largely analogous patterns of results.

**DISCUSSION:** Supporting conclusions from basic research, our results suggest that estrogens (proxied here by AOM) interact with several biological pathways mediating dementia disease processes. In line with trends in hormone research across the past century, our findings challenge the oversimplified 'more-is-better' perspective on hormone exposure. Specifically, the non-linear association we observed between AOM and dementia risk points to the involvement of distinct and interacting biological mechanisms beyond just estrogen levels.

## Acknowledgements

We acknowledge The Swedish Twin Registry for access to data. The Swedish Twin Registry is managed by Karolinska Institutet and receives funding through the Swedish Research Council under the grant no 2017-00641.

## Author Approval

All authors have seen and approved the manuscript.

## Funding Statement

NIH R21 AG074212; NIH R01 AG060470

## Conflicts

The authors have no conflicts to disclose

## Consent Statement

Consent was not necessary because this project only included secondary data analysis.

## Competing Interests

The authors have no competing interests to disclose.

## Data Availability

Data can be requested from the Karolinska Institutet; <https://ki.se/en/research/research-infrastructure-and-environments/core-facilities-for-research/the-swedish-twin-registry>

## Abbreviations

AOM: Age of menopause

CPHR: Cox proportional hazards regression

IM: Induced menopause

OC: Oral contraceptives

MCCC: Multidisciplinary clinical consensus conference

MHT: Menopausal hormone therapy

SM: Spontaneous menopause

STR: Swedish Twin Registry

## 1 Background

In contrast to the steady decline of testosterone levels observed in men across the adult lifespan<sup>1</sup>, women experience a sharp drop in the production of estrogens by the ovaries at the time of menopause<sup>2,3</sup>. Estrogens play a pivotal role in neuro- and cardio-protective pathways; therefore, an earlier age of menopause (AOM) and thus the prolonged experience of a relative poverty of endogenous estrogens is hypothesized to increase a woman's vulnerability to dementia-related pathophysiological processes that often begin already in midlife<sup>4-13</sup>.

Despite plausible mechanisms emerging from preclinical research, direct tests of this estrogen-poverty hypothesis have produced mixed results and attempts to meaningfully synthesize this literature have been severely hindered by the methodological heterogeneity of the primary studies. For example, a 2016 meta-analysis of 13 studies including 19,449 women found no difference in dementia risk between the youngest and oldest AOM groups<sup>14</sup>. Conversely, two subsequent meta-analyses, including 14 and 11 primary studies respectively, reported a pattern of increased dementia risk associated with "early" menopause (AOM < 45) and primary ovarian insufficiency (AOM < 40)<sup>15,16</sup>. However, sensitivity analyses revealed that the exclusion of an exceptionally large cohort contributing roughly 99% of the participant level data to both analyses<sup>17</sup>, nullified the effect.

A woman's AOM is defined by the age of her final menstrual period, provided amenorrhea has occurred for 12 consecutive months. AOM is inherently a continuous variable without biologically meaningful categories. Therefore, in addition to reducing statistical power and increasing the probability of false positives, the use of arbitrary categories, as was done in many of the previous investigations, limits statistical power and hinders between-study comparisons<sup>18,19</sup>.

Further, permanent amenorrhea can result from the spontaneous depletion of ovarian follicles (i.e., spontaneous or natural menopause), the removal of the ovaries via bilateral oophorectomy (i.e., induced or surgical menopause), or the removal of the uterus via hysterectomy. Despite producing analogous phenotypes, each of the three etiologies is associated with a distinct hormone profile<sup>20,21</sup>. Given that the change in estrogen levels is hypothesized to mediate the association between AOM and dementia risk, it is crucial to consider menopause etiology so that the results can be meaningfully interpreted in the context of plausible mechanisms. However, few studies collect sufficient gynecological surgery histories to characterize women's menopause etiology. Similarly, the use of exogenous hormones, either through oral contraceptives (OC) or menopausal hormone therapy (MHT), has widespread impacts on the endocrine system, but lifetime history of hormone use is rarely available.

Given these noted limitations, we aim to contribute to the literature by examining associations between continuous AOM and dementia risk within a large sample of Swedish women with detailed reproductive health histories including previous gynecological surgeries and lifetime history of exogenous hormone use. This comprehensive data set enabled continuous analyses stratified by menopause etiology and sensitivity analyses conducted in a sample of exogenous hormone naïve women in order to understand the influence of menopause etiology and hormone use on the AOM and dementia connection.

## 2 Methods

Data were obtained from female individuals from the Swedish Twin Registry (STR) who participated in the Screening Across the Lifespan Twin (SALT) study between 1998 and 2002 (see Figure 1). Detailed information regarding the STR research infrastructure and SALT protocols can be found elsewhere<sup>22,23</sup>. Briefly, SALT aimed to screen for the most common complex diseases among twins enrolled in the STR born prior to 1959. Through a computer-assisted structured telephone interview, researchers screened participants for cognitive impairment and collected detailed self-reported health data including female-specific health factors such as AOM, births, history of gynecological surgeries, OC and MHT use.

### 2. 1 Data Acquisition and Model Parameters

#### 2.1.1 Menopause

##### 2.1.1.1 Etiology

If women reported 12 consecutive months of amenorrhea that did not result from medical treatment or gynecological surgery, they were classified as having experienced spontaneous menopause (SM). If women reported a history of unilateral or bilateral oophorectomy (removal of one or both of the ovaries) or salpingo-oophorectomy (removal of the ovaries and fallopian tube(s)) concurrent with or prior to spontaneous amenorrhea, they were classified as having experienced induced menopause (IM), regardless of whether a hysterectomy (removal of the uterus) was performed concurrently. Women who reported a hysterectomy (without oophorectomy) prior to spontaneous or induced menopause were excluded from analyses to ensure that the AOM demarcates a hormonal, rather than phenotypic change (i.e., the absence of menses). Women who were still in the reproductive or menopause transition stages at the time of the SALT interview (i.e., those still experiencing regular periods and those experiencing

irregular periods with less than 12 consecutive months of amenorrhea, respectively) were classified as premenopausal and were excluded from the analyses.

### *2.1.1.2 Age*

Consistent with the Stages of Reproductive Aging Workshop + 10 staging<sup>24</sup>, the spontaneous AOM was defined as women's self-reported age of final menstrual period, provided that at least 12 consecutive months of amenorrhea occurred between the final menstrual period and the time of report. The self-reported age of oophorectomy was used to define the AOM within the IM sample.

## 2.1. 2 Dementia

### 2.1.2.1 Diagnosis

#### 2.1.2.1.1 STR Screening and MCCC Diagnosis

The protocols for diagnosing dementia in STR have been described in detail elsewhere<sup>25,26</sup>. Briefly, individuals 65 and older were given a cognitive screening instrument as part of the SALT protocol. Individuals showing evidence of impairment and their co-twin were referred to an in-person clinical visit with a physician and psychologist which resulted in a differential dementia diagnosis through a multidisciplinary clinical consensus conference (MCCC). Where possible, the etiology of the dementia was ascertained and those presenting with dementia resulting from causes independent of aging (e.g., brain trauma, Multiple Sclerosis, hydrocephalus, Parkinson's disease, Korsakoff's syndrome etc.) were excluded.

#### 2.1.2.1.2 National Patient Registers

In addition to the screening of those over age 65 at the time of the SALT interview, the cognitive status of all participants was monitored through linkages with national patient registers until December 31, 2016. Individuals were given a dementia diagnosis if a) diagnostic codes

associated with dementia appeared in in- or out-patient health records, b) individuals were prescribed drugs used to treat dementia, or c) if dementia was listed as a contributing factor to death<sup>26</sup>.

#### *2.1.2.2 Age of onset*

For participants diagnosed with dementia via STR MCCC, an age of dementia onset was estimated through a combination of patient and informant interviews and medical record review<sup>27</sup>. For those participants diagnosed with dementia only through the National Patient Register, the age of onset was estimated using a linear model that leveraged the observed discrepancies between STR MCCC estimated onset and the age of register appearance among the 419 women with both sources of data and a MCCC estimated age of onset later than 65. Congruent with a previous investigation<sup>28</sup>, the difference between the MCCC estimated age of dementia onset and the appearance of a dementia-associated diagnostic code or prescription record in a patient register averaged 4-5 years, and an average of 9 years elapsed between the MCCC age of onset and death.

If this model predicted an age of onset occurring after 65 but prior to the SALT interview, the age of onset was modified to be the midpoint between the SALT interview and the age of register indicator appearance (see Figure 2). As noted in section 2.1.2.1.1, cognitive screening was performed for all participants aged 65 and older and those demonstrating impairments were referred for in-person follow up. Therefore, if the individual was showing signs of dementia at the time of interview, a MCCC diagnosis would be available, and no register-based estimate would have been calculated. Without additional information, the midpoint provides the best estimate for this group.



### 2.1.3 Exclusionary Criteria

No missing data imputation was conducted. Therefore, only participants with complete data relating to the age and etiology of menopause, the diagnosis (or lack thereof) of dementia, an estimated age of onset when relevant, and all relevant covariates were included. All analyses were restricted to women with an AOM between 30 and 64 (inclusive). Women who reported a lifetime history of medical conditions known to impact menstrual cycles such as polycystic ovarian syndrome, or cancer were excluded. Finally, women for whom no follow-up data were available after age 65, who experienced onset of dementia prior to age 65 or prior to the SALT interview were also excluded.

### 2.2 Summary of Statistical Analyses

Data processing and analyses were conducted in R version 4.0.4<sup>29</sup> utilizing the survival and survminer packages<sup>30,31</sup>. As visualized in Figure 1, age was used as the timescale for all CPHR models with age 65 demarcating the model start-of-time. Women whose SALT interview occurred after age 65 were treated as delayed entrants and were not included in the at-risk sample until her age of SALT interview. Dementia diagnosis was used as the model event and the estimated age of onset was used as the event time. Women that were not diagnosed with dementia during the observational period were censored (i.e., removed from the at-risk sample) at the age of death, emigration, or age on December 31, 2016. Observations were clustered by twin pair, ties were handled using Breslow's exact method and the proportional hazards assumption was tested for all models using the method described by Grambsch and Therneau<sup>32</sup> via the *cox.zph* function.

For each question, an unadjusted and a covariate-adjusted model was applied to the relevant data. All covariate-adjusted models included three ordered factor covariates: the self-

reported number of births (0, 1, 2, or 3+), lifetime educational attainment (primary or less, some or complete secondary, or post-secondary) and smoking history (ever regular smoker or never regular smoker).

## 2.2.1 Primary Analyses

### 2.2.1.1 Menopause etiology

To examine whether IM impacts dementia risk we applied model with menopause etiology as a binary variable (IM versus SM). AOM (centered at age 30) was included in the adjusted model.

### 2.2.1.2 Linear and Quadratic AOM

To address our primary hypotheses regarding the association between continuous AOM and dementia, we fit two model sets each to the SM and IM samples. The first model imposed a linear association between AOM (centered at age 30) and dementia risk and the second imposed a quadratic association.

## 2.2.2 Sensitivity Analyses

Planned sensitivity analyses applied the same series of models to three defined subsamples of women with SM: *APOE*  $\epsilon$ 4+, *APOE*  $\epsilon$ 4- and hormone naïve (i.e., never users of OC or HRT). Post-hoc sensitivity analyses were conducted in subsamples of the SM and IM groups restricted to those with an AOM < 61 to examine whether the pattern of results is influenced by the AOM range.

## 2.2.3 Supplemental Analyses

### 2.2.3.1 Primary Ovarian Insufficiency and Early Menopause

For comparison with existing literature that used a categorical definition of age at menopause, a second series of two model sets were fit to the SM sample. The first modeled

primary ovarian insufficiency diagnosis (defined as AOM < 40) as a binary variable. The second modeled early menopause status (defined as AOM < 45) as a binary variable.

### *2.2.3.2 Influence of Modeling Parameters*

To provide real-world exploration of the impact of key model choices in the context of age-dependent disease outcomes, we modified the primary models (linear and quadratic associations between AOM and dementia) by 1) the use of time-on-study as timescale (rather than age, which we believe to be the appropriate timescale and therefore applied to all previous models), and/or 2) using “complete-cases” analyses (rather than delayed-entry) which necessitate the restriction of the sample to either: 1) those women who were under study prior to becoming “at risk” of the event, defined as age 65 here. That is, those women who were postmenopausal but not yet 65 at the time of her SALT interview. Or, 2) A sample restricted to those with equivalent opportunity to experience the factor of interest (post-menopausal status) prior to observation. That is, women who were 65 or older at the time of her SALT interview.

### 3 Results

A total of 10,832 women met the criteria for inclusion. As shown in Figure 3, the most common reasons for exclusion were being premenopausal at the time of the SALT interview or having an unknown AOM, accounting for 37% and 18% of excluded cases respectively.

Consistent with historical trends among Swedish women<sup>33</sup> 94% of women experienced SM (see Table 1). Of the 10,173 women who experienced SM, 58% were considered exogenous hormone naïve (i.e., they reported never using exogenous hormones). Compared to hormone users, the hormone naïve participants were born earlier (average birth year 1933 versus 1939; see Supplemental Table 1), which is consistent with the introduction of OC in Sweden in the mid 1960s<sup>34</sup> and increase in popularity of MHT during that same time<sup>35</sup>.

As anticipated given that evidence of dementia at the time of the SALT interview was an exclusion criterion, only 40 of the 1,357 dementia cases had an onset date estimated by MCCC, the remaining estimated onset ages were based on patient register indicators. Of these estimates, 138 were adjusted to the midpoint as described in section 2.1.2.2.

#### 3.1 Primary Analyses

There was some evidence for the violation of the proportional hazards assumption suggesting that the influence of ever regularly smoking on dementia risk is not consistent over time (see Supplemental Table 2). No other variables or global tests violated the proportional hazards assumption ( $p > .05$ ).

##### 3.1.1 Spontaneous Menopause

As shown in Table 3, Among women with SM, the linear model was a poor fit. Applying a quadratic model improved the fit, and this was unchanged in the adjusted models. Figure 4 shows the relative risk ratios derived from the quadratic model. The model indicates that a

woman who experienced menopause at age 31 has more than 2.5 times the risk of developing dementia compared to a woman with an average age of menopause (around age 51). Similarly, a woman experiencing menopause at age 64 has almost 2 times greater risk of developing dementia compared to a woman with an average age of menopause across follow-up.

### 3.1.2 Induced Menopause

IM was not independently associated with dementia risk when covarying for AOM. Among women with IM, there was a negative linear association between the AOM and dementia risk. Specifically, each additional year of premenopausal status was associated with 5.8% lower dementia risk. There was no evidence of a quadratic association between AOM and dementia risk among women with IM (see Table 3).

### 3.2 Sensitivity Analyses

When stratified by *APOE*  $\epsilon 4$  carrier status, the quadratic association between AOM and dementia risk only remained marginally significant for  $\epsilon 4$  carriers (see Table 4). Restricting analyses to the hormone naïve subsample did not meaningfully change the pattern of results, nor did restricting analyses to the women who experienced SM prior to age 61 (see Supplemental Table 3).

### 3.3 Supplemental Analyses

#### 3.3.1 Primary Ovarian Insufficiency and Early Menopause

Early menopause (AOM < 45) was associated with an approximately 20% increase in dementia risk, while primary ovarian insufficiency (AOM < 40) was not significantly associated with dementia risk (see Table 2).

### 3.3.2 Influence of Modeling Parameters

As shown in Supplemental Table 4 when time-on-study rather than age was used as the model time there was evidence that the proportional hazards assumption was violated, driven by interview age, for both the linear and quadratic models in both the SM and IM samples. However, the CPHR model results were numerically similar to those observed in the primary analyses (see Supplemental Table 5).

Further, as anticipated, when analyses were conducted using complete cases rather than delayed entry, the sample size, and therefore the statistical power dropped (see Supplemental Table 6). Notably, just 4% of individuals who completed the SALT interview prior to age 66 received a dementia diagnosis during follow-up, compared to almost 25% of participants interviewed on or after age 65. This discrepancy is likely due to the increased risk of dementia with increasing age. Specifically, those with a younger interview age would also be followed at a younger age interval wherein they would be less at-risk for developing dementia than those interviewed at older ages. However, the quadratic association was only statistically significant in the sample interviewed prior to age 66 using time-on-study as model time (see Supplemental Table 7).

## 4 Discussion

Our analysis found that dementia risk increases with deviation from the typical age of menopause (AOM), regardless of direction among women with SM. Experiencing menopause 10 years earlier or later than the typical AOM was associated with a nearly 30% increase in dementia risk. While the estrogen hypothesis suggests a linear link between AOM and dementia risk, the quadratic association observed here suggests that estrogen interacts with multiple biological processes involved in the pathogenesis of dementia.

Consistent with prior findings, there was no difference in dementia risk between women with IM and those with SM<sup>36</sup>. Among women with IM, each additional reproductive year was linked to a 5% decrease in dementia risk.

However, we hesitate to interpret these findings in a biological context. Because the associated SALT question did not specify laterality, the IM classification was applied for either a bilateral or a unilateral oophorectomy despite the distinct hormone profiles associated with the surgeries<sup>20,21</sup>.

Interestingly, early menopause (AOM < 45) was linked to increased dementia risk, but primary ovarian insufficiency (AOM < 40) was not. However, in line with estimates from similar populations, just 2% of the sample experienced primary ovarian insufficiency, and of these women, just 31 also developed dementia during follow-up.

Notably, the quadratic association between AOM and dementia risk only remained marginally significant among *APOE*  $\epsilon$ 4 carriers. This is consistent with the evidence for interactive effects of estrogen with  $\epsilon$ 4 allele carriership<sup>37,38</sup>, but should be interpreted with caution given the relatively small sample size.

## 4.1 Application of Survival Models to Cohort Studies

Cohort studies, like the STR, offer significant advantages for researching disease outcomes, including large sample sizes, comprehensive demographic and health data, and extended follow-up. However, cohort studies have several drawbacks and present a unique challenge for the application of CPHR models<sup>39</sup>.

### 4.1.1 Reliance on patient registers

A limitation of the CPHR model is that participants cannot have experienced the event (dementia onset) before the model's start (the later of age 65 or SALT interview). Only 3% of dementia onset events were defined by the MCCC, with the rest relying on patient register data. Register indicators, while highly specific, appeared for only 64.5% of MCCC-confirmed dementia cases.

The use of patient registers for dementia onset estimation presents a methodological challenge for survival models due to the delay between the onset of dementia symptoms and the point at which medical care (or death) results in a register-recorded indicator. This delay complicates survival modeling, which depends on meaningful and theoretically consistent event times. To address this, we utilized data from MCCC defined dementia cases within the STR to model the delay and estimate the true age of dementia onset based on the specific patient register and participant age.

### 4.1.2 Reliance on self-report

AOM was self-reported. Previous investigations demonstrate that when recalling AOM, nearly 70% of women are accurate within 1-year, even after almost a decade<sup>40,41</sup>. Further, even after almost two decades, 55% of women confirmed a previous report within 1-year<sup>42</sup>. However, both validity and reliability are reduced with increasing time since menopause<sup>41,42</sup> while



regression to the mean and the tendency to report an AOM of 50 increase<sup>42</sup>. Given that there was a median of 11.5 years between the self-reported AOM and the SALT interview, some inaccuracy in AOM exists.

Gynecological surgery history was also self-reported. A recent study found that while 80% of women reporting a hysterectomy had a corresponding medical record, one in three women reporting bilateral oophorectomy did not have a corresponding medical record<sup>43</sup>. Thus, the IM sample likely includes women with SM, potentially affecting power, though inclusion of SM women in the IM sample is unlikely.

#### 4.1.3 Relevant Sample Size

Like other regression models, the power of the CPHR models stems from the sample size. However, model power is based on the number of individuals experiencing the event, rather than total sample size. Although overly simplistic, it is generally accepted that a minimum of 10 events are needed per covariate for adequate power<sup>44</sup>. As shown in Table 1, just 68 women experienced both IM and dementia during follow-up, suggesting that the adjusted model is slightly underpowered for the ordered covariates despite a total sample size of over 1,000.

#### 4.1.4 Meaningful model start-of-time

Owing to their original application to intervention studies, study entry is often used as the model start-of-time. When applied to cohort studies however, this approach creates bias<sup>45-48</sup> because only those surviving to the arbitrary time of study initiation (here, the SALT interviews conducted between 1998 and 2002) are included, while those who already experienced the event (dementia onset) are systematically excluded.

Age 65 was the optimal model start of time because it a) best accounts for the association between age and dementia risk, b) is the age that the cognitive screening was added to the SALT

interview protocol, allowing for the confirmation of cognitive status at baseline for the majority of women, and c) is an age at which almost all women are post-menopausal meaning that all women experienced the “intervention” (menopause) prior to the model start-of-time

#### 4.1.5 Inability to capture time-varying covariates

Because the CPHR model requires that covariate values be known for individuals in the at-risk set at all model event times, which, in practice encompasses the entire timescale, factors of interest which are not stable across time cannot be meaningfully included in the models unless they are measured or can be reasonably estimated for all event times.

As an example, BMI was available at the time of SALT interview models. Following menopause, endogenous estrogen is primarily aromatized in adipose tissue<sup>49</sup>, resulting in a positive association between post-menopausal adiposity and endogenous estrogen<sup>50,51</sup>. Therefore, within the estrogen hypothesis framework, higher adiposity should indirectly confer a neuroprotective effect, and there is some evidence of this effect<sup>52</sup>. However, neither adiposity nor the association between BMI and fat mass are stable across time<sup>49</sup>. Further, established associations between BMI and various health outcomes (including dementia risk) vary as a function of age<sup>53</sup>. Given that the age of SALT interview (and therefore the age of known BMI) ranged from 50 to 97, no cohesive interpretation of the construct reflected by the available measure of BMI could be determined.

#### 4.2 Strengths and Limitations

Among the strengths of the current investigation is the STR’s development and early adoption of detailed demographic and women’s health history questionnaires. This investment enabled the statistical consideration of several key factors shown to impact both AOM and

dementia risk<sup>54,55</sup>. Future studies utilizing combined interviews and medical record data are well poised to address current limitations<sup>56,57</sup>.

First, self-reported AOM is conceptualized here as a demarcation of a sharp and permanent decline in exogenous circulating estrogen levels. Although meaningfully true, the menopause transition occurs over a period of years and is characterized by large hormonal fluctuations followed by a consistent trend of decline until relative stability is reached and maintained through the post-menopausal period<sup>24</sup>. The nuance and individual differences in the transition could only be meaningfully captured by repeated hormone sampling beginning before the cessation of menses<sup>58,59</sup>. Such sampling would be logistically implausible and prohibitively expensive for most cohort studies.

Second, the influence of exogenous hormone use could not be fully examined. Although women provided specific OC and MHT formulations, even approaches which account for the relative differences in hormone dose (which decreased by an entire order of magnitude since their introduction compared to more modern formulations<sup>60</sup>), and the variance in the endocrine effects of the varying progestin (which can elicit opposing changes<sup>60</sup>) would not account for biologically meaningful factors such as duration and continuity of use or age of initiation.

In light of the critical window hypothesis which posits that MHT is beneficial if initiated shortly after menopause but detrimental if administered too long after the menopause transition<sup>61,62</sup>, as well as the close proximity of menopause to the potential initial accumulation of dementia pathology<sup>9</sup>, the delay between menopause is biologically interesting but could not be examined here. A further barrier to the meaningful consideration of associations between MHT and dementia risk in the context of the estrogen hypothesis is the primary use of MHT to

alleviate menopausal symptoms, which are themselves frequently indicative of lower endogenous estrogen levels<sup>63</sup>.

Given the complexities of examining exogenous hormone use coupled with the relative infrequency of dementia, particularly amongst the women in the cohort born late enough to have exogenous hormones available, we elected to conduct sensitivity analyses in women that never used exogenous hormones, maximizing homogeneity.

#### 4.3 Conclusion

Within a sample of over 10,000 postmenopausal women enrolled in the STR, we found that both early and late AOM conferred increased dementia risk in comparison to more typical AOM. These results are consistent with preclinical work showing interactions between estrogen and dementia processes. However, the mechanisms underlying the association between AOM and dementia risk have yet to be fully elucidated.

## References

1. Platz EA, Barber JR, Chadid S, et al. Nationally representative estimates of serum testosterone concentration in never-smoking, lean men without aging-associated comorbidities. *J Endocr Soc*. Oct 1 2019;3(10):1759-1770. doi:10.1210/js.2019-00151
2. Perlman B, Kulak D, Goldsmith LT, Weiss G. The etiology of menopause: Not just ovarian dysfunction but also a role for the central nervous system. *Global Reproductive Health*. 2018;3(2):e8-e8. doi:10.1097/grh.0000000000000008
3. Randolph JF, Jr, Zheng H, Sowers MR, et al. Change in follicle-stimulating hormone and estradiol across the menopausal transition: Effect of age at the final menstrual period. *The Journal of Clinical Endocrinology & Metabolism*. 2011;96(3):746-754. doi:10.1210/jc.2010-1746
4. Villemagne VL, Burnham S, Bourgeat P, et al. Amyloid beta deposition, neurodegeneration, and cognitive decline in sporadic Alzheimer's disease: a prospective cohort study. *Lancet Neurol*. Apr 2013;12(4):357-67. doi:10.1016/S1474-4422(13)70044-9
5. Insel PS, Donohue MC, Berron D, Hansson O, Mattsson-Carlsson N. Time between milestone events in the Alzheimer's disease amyloid cascade. *Neuroimage*. 2021;227:1. doi:10.1016/j.neuroimage.2020.117676
6. Barth C, Crestol A, de Lange A-MG, Galea LAM. Sex steroids and the female brain across the lifespan: insights into risk of depression and Alzheimer's disease. *The Lancet Diabetes & Endocrinology*. 2023;11(12):926-941. doi:10.1016/S2213-8587(23)00224-3
7. Mishra A, Wang Y, Yin F, et al. A tale of two systems: Lessons learned from female mid-life aging with implications for Alzheimer's prevention & treatment. *Ageing Res Rev*. 2022;74:101542. doi:10.1016/j.arr.2021.101542

8. Conde DM, Verdade RC, Valadares ALR, Mella LFB, Pedro AO, Costa-Paiva L. Menopause and cognitive impairment: A narrative review of current knowledge. *World J Psychiatry*. 2021;11(8):412-428. doi:10.5498/wjp.v11.i8.412
9. Luo J, Agboola F, Grant E, et al. Accelerated longitudinal changes and ordering of Alzheimer disease biomarkers across the adult lifespan. *Brain*. 2022;doi:10.1093/brain/awac238
10. Schindler E, Hemachandra Reddy P. 16 - Women and Alzheimer's disease: a focus on sex. In: Reddy PH, John A, eds. *COVID-19 in Alzheimer's Disease and Dementia*. Academic Press; 2023:273-305.
11. Udeh-Momoh C, Watermeyer T, consortium FBHER. Female specific risk factors for the development of Alzheimer's disease neuropathology and cognitive impairment: Call for a precision medicine approach. *Ageing Res Rev*. Nov 2021;71:101459. doi:10.1016/j.arr.2021.101459
12. Jett S, Malviya N, Schelbaum E, et al. Endogenous and exogenous estrogen exposures: How women's reproductive health can drive brain aging and inform Alzheimer's prevention. *Front Aging Neurosci*. 2022;14:831807. doi:10.3389/fnagi.2022.831807
13. Jett S, Schelbaum E, Jang G, et al. Ovarian steroid hormones: A long overlooked but critical contributor to brain aging and Alzheimer's disease. *Front Aging Neurosci*. 2022;14:948219. doi:10.3389/fnagi.2022.948219
14. Georgakis MK, Kalogirou EI, Diamantaras AA, et al. Age at menopause and duration of reproductive period in association with dementia and cognitive function: A systematic review and meta-analysis. *Psychoneuroendocrinology*. 2016;73:224-243. doi:10.1016/j.psyneuen.2016.08.003

15. Karamitrou EK, Anagnostis P, Vaitis K, Athanasiadis L, Goulis DG. Early menopause and premature ovarian insufficiency are associated with increased risk of dementia: A systematic review and meta-analysis of observational studies. *Maturitas*. 2023;176:107792. doi:10.1016/j.maturitas.2023.107792
16. Fu C, Hao W, Shrestha N, Virani SS, Mishra SR, Zhu D. Association of reproductive factors with dementia: A systematic review and dose-response meta-analyses of observational studies. *EClinicalMedicine*. 2022;43:101236. doi:10.1016/j.eclinm.2021.101236
17. Yoo JE, Shin DW, Han K, et al. Female reproductive factors and the risk of dementia: a nationwide cohort study. *Eur J Neurol*. 2020;27(8):1448-1458. doi:10.1111/ene.14315
18. Bennette C, Vickers A. Against quantiles: Categorization of continuous variables in epidemiologic research, and its discontents. *BMC Medical Research Methodology*. 2012;12(21)doi:10.1186/1471-2288-12-21
19. Nguyen TV, Rivadeneira F, Civitelli R. New guidelines for data reporting and statistical analysis: Helping authors with transparency and rigor in research. *J Bone Miner Res*. 2019;34(11):1981-1984. doi:10.1002/jbmr.3885
20. Soares AG, Kilpi F, Fraser A, et al. Longitudinal changes in reproductive hormones through the menopause transition in the Avon Longitudinal Study of Parents and Children (ALSPAC). *Sci Rep*. 2020;10(1):21258. doi:10.1038/s41598-020-77871-9
21. Pillay CO, Manyonda I. The surgical menopause. *Best Pract Res Clin Obstet Gynaecol*. May 2022;81:111-118. doi:10.1016/j.bpobgyn.2022.03.001
22. Zagai U, Lichtenstein P, Pedersen NL, Magnusson PKE. The Swedish Twin Registry: Content and management as a research infrastructure. *Twin Res Hum Genet*. Dec 2019;22(6):672-680. doi:10.1017/thg.2019.99

23. Lichtenstein P, Sullivan PF, Cnattingius S, et al. The Swedish Twin Registry in the third millennium: An update. *Twin Research and Human Genetics*. 2006;9(6):875-882.  
doi:10.1375/twin.9.6.875
24. Harlow SD, Gass M, Hall JE, et al. Executive summary of the Stages of Reproductive Aging Workshop + 10: Addressing the unfinished agenda of staging reproductive aging. *J Clin Endocrinol Metab*. Apr 2012;97(4):1159-68. doi:10.1210/jc.2011-3362
25. Gatz M, Fratiglioni L, Johansson B, et al. Complete ascertainment of dementia in the Swedish Twin Registry: The HARMONY study. *Neurobiol Aging*. 2005;26(4):439-47.  
doi:10.1016/j.neurobiolaging.2004.04.004
26. Karlsson IK, Lehto K, Gatz M, Reynolds CA, Dahl Aslan AK. Age-dependent effects of body mass index across the adult life span on the risk of dementia: a cohort study with a genetic approach. *BMC Med*. Jun 9 2020;18(1):131. doi:10.1186/s12916-020-01600-2
27. Fiske A, Gatz M, Aadnøy B, Pedersen NL. Assessing age of dementia onset: Validity of informant reports. *Alzheimer Disease & Associated Disorders*. 2005;19(3):128-134.  
doi:10.1097/01.wad.0000174947.76968.74
28. Rizzuto D, Feldman AL, Karlsson IK, Dahl Aslan AK, Gatz M, Pedersen NL. Detection of dementia cases in two Swedish health registers: A validation study. *J Alzheimers Dis*. 2018;61(4):1301-1310. doi:10.3233/JAD-170572
29. R Core Team. *R: A language and environment for statistical computing*. R Foundation for Statistical Computing; 2020.
30. *A package for survival analysis in R*. Version R package version 3.2-3. 2020.  
<https://CRAN.R-project.org/package=survival>



31. *survminer: Drawing Survival Curves using 'ggplot2'*. Version R package version 0.4.9. 2021. <https://CRAN.R-project.org/package=survminer>
32. Grambsch PM, Therneau TM. Proportional hazards tests and diagnostics based on weighted residuals. *Biometrika*. 1994;81(3):515-526.
33. Rodstrom K, Weman L, Sandin L, Hange D, Bjorkelund C. Is it possible to investigate menopausal age? A comparative cross-sectional study of five cohorts between 1968 and 2017 from the Population Study of Women in Gothenburg, Sweden. *Menopause*. Apr 2020;27(4):430-436. doi:10.1097/GME.0000000000001476
34. Zettermark S. Invisible, responsible women in Sweden – planning pregnancies, choosing contraceptives. *NORA - Nordic Journal of Feminist and Gender Research*. 2023;31(4):349-366. doi:10.1080/08038740.2023.2214742
35. Kohn GE, Rodriguez KM, Hotaling J, Pastuszak AW. The history of estrogen therapy. *Sex Med Rev*. Jul 2019;7(3):416-421. doi:10.1016/j.sxmr.2019.03.006
36. Georgakis MK, Beskou-Kontou T, Theodoridis I, Skalkidou A, Petridou ET. Surgical menopause in association with cognitive function and risk of dementia: A systematic review and meta-analysis. *Psychoneuroendocrinology*. Aug 2019;106:9-19. doi:10.1016/j.psyneuen.2019.03.013
37. Valencia-Olvera AC, Maldonado Weng J, Christensen A, LaDu MJ, Pike CJ. Role of estrogen in women's Alzheimer's disease risk as modified by APOE. *J Neuroendocrinol*. Oct 20 2022:e13209. doi:10.1111/jne.13209
38. Depypere H, Vergallo A, Lemercier P, et al. Menopause hormone therapy significantly alters pathophysiological biomarkers of Alzheimer's disease. *Alzheimers Dement*. 2022;doi:10.1002/alz.12759

39. Singer JD, Willett JB. *Applied Longitudinal Data Analysis: Modeling Change and Event Occurrence*. Oxford University Press; 2003.
40. Clavel-Chapelon F, Dormoy-Mortier N. A validation study on status and age of natural menopause reported in the E3N cohort. *Maturitas*. 1998;29:99-103.
41. den Tonkelaar I. Validity and reproducibility of self-reported age at menopause in women participated in the DOM-project. *Maturitas*. 1997;27:117-123.
42. Rodstrom K, Bengtsson C, Lissner L, Bjorkelund C. Reproducibility of self-reported menopause age at the 24-year follow-up of a population study of women in Goteborg, Sweden. *Menopause*. May-Jun 2005;12(3):275-80. doi:10.1097/01.gme.0000135247.11972.b3
43. Rosland TE, Johansen N, Åsvold BO, Pripp AH, Liavaag AH, Michelsen TM. Validity of self-reported hysterectomy and oophorectomy in a population-based cohort: The HUNT study. *BJOG: An International Journal of Obstetrics & Gynaecology*. 2024;131(11):1555-1562. doi:10.1111/1471-0528.17859
44. Vittinghoff E, McCulloch CE. Relaxing the rule of ten events per variable in logistic and Cox regression. *Am J Epidemiol*. Mar 15 2007;165(6):710-8. doi:10.1093/aje/kwk052
45. Sperrin M, Buchan I. Modelling time to event with observations made at arbitrary times. *Statistics in Medicine*. Jan 15 2013;32(1):99-109. doi:10.1002/sim.5509
46. Lee C, Betensky RA, Alzheimer's Disease Neuroimaging I. Time-to-event data with time-varying biomarkers measured only at study entry, with applications to Alzheimer's disease. *Stat Med*. Mar 15 2018;37(6):914-932. doi:10.1002/sim.7547
47. Thiebaut AC, Benichou J. Choice of time-scale in Cox's model analysis of epidemiologic cohort data: A simulation study. *Stat Med*. Dec 30 2004;23(24):3803-20. doi:10.1002/sim.2098

48. Korn EL, Graubard BI, Midthune D. Time-to-event analysis of longitudinal follow-up of a survey: Choice of the time-scale. *American Journal of Epidemiology*. 1997;145(1):72-80.
49. Rehman A, Lathief S, Charoenngam N, Pal L. Aging and adiposity-focus on biological females at midlife and beyond. *Int J Mol Sci*. Mar 4 2024;25(5)doi:10.3390/ijms25052972
50. Oh H, Coburn SB, Matthews CE, et al. Anthropometric measures and serum estrogen metabolism in postmenopausal women: the Women's Health Initiative Observational Study. *Breast Cancer Res*. Mar 11 2017;19(1):28. doi:10.1186/s13058-017-0810-0
51. Zsakai A, Karkus Z, Utczas K, Biri B, Sievert LL, Bodzsar EB. Body fatness and endogenous sex hormones in the menopausal transition. *Maturitas*. May 2016;87:18-26. doi:10.1016/j.maturitas.2016.02.006
52. Schindler LS, Subramaniapillai S, Barth C, et al. Associations between abdominal adipose tissue, reproductive span, and brain characteristics in post-menopausal women. *Neuroimage Clin*. 2022;36:103239. doi:10.1016/j.nicl.2022.103239
53. Peditizi E, Peters R, Beckett N. The risk of overweight/obesity in mid-life and late life for the development of dementia: A systematic review and meta-analysis of longitudinal studies. *Age and Ageing*. 2016;45(1):14-21. doi:10.1093/ageing/afv151
54. Pourhadi N, Morch LS, Holm EA, Torp-Pedersen C, Meaidi A. Menopausal hormone therapy and dementia: Nationwide, nested case-control study. *BMJ*. Jun 28 2023;381:e072770. doi:10.1136/bmj-2022-072770
55. Puri TA, Richard JE, Galea LAM. Beyond sex differences: short- and long-term effects of pregnancy on the brain. *Trends Neurosci*. Jun 2023;46(6):459-471. doi:10.1016/j.tins.2023.03.010

56. Roberts Davis M, Hiatt SO, Gupta N, Dieckmann NF, Hansen L, Denfeld QE. Incorporating reproductive system history data into cardiovascular nursing research to advance women's health. *European Journal of Cardiovascular Nursing*. 2024;23(2):206-211. doi:10.1093/eurjcn/zvad125
57. Beall CM, Leslie PW. Collecting women's reproductive histories. *Am J Hum Biol*. 2014;26(5):577-89. doi:10.1002/ajhb.22543
58. Paramsothy P, Harlow SD, Nan B, et al. Duration of the menopausal transition is longer in women with young age at onset: the multiethnic Study of Women's Health Across the Nation. *Menopause*. Feb 2017;24(2):142-149. doi:10.1097/GME.0000000000000736
59. Paramsothy P, Harlow SD, Elliott MR, Lisabeth LD, Crawford SL, Randolph JF, Jr. Classifying menopause stage by menstrual calendars and annual interviews: Need for improved questionnaires. *Menopause*. Jul 2013;20(7):727-35. doi:10.1097/GME.0b013e3182825ff2
60. Hampson E. Oral contraceptives in the central nervous system: Basic pharmacology, methodological considerations, and current state of the field. *Front Neuroendocrinol*. 2023;68:101040. doi:10.1016/j.yfrne.2022.101040
61. Guo H, Liu M, Zhang L, et al. The critical period for neuroprotection by estrogen replacement therapy and the potential underlying mechanisms. *Curr Neuropharmacol*. 2020;18(6):485-500. doi:10.2174/1570159X18666200123165652
62. Scott E, Zhang QG, Wang R, Vadlamudi R, Brann D. Estrogen neuroprotection and the critical period hypothesis. *Front Neuroendocrinol*. Jan 2012;33(1):85-104. doi:10.1016/j.yfrne.2011.10.001

63. Stadberg E, Mattsson LA, Milsom I. The prevalence and severity of climacteric symptoms and the use of different treatment regimens in a Swedish population. *Acta Obstet Gynecol Scand.* May 1997;76(5):442-8. doi:10.3109/00016349709047826

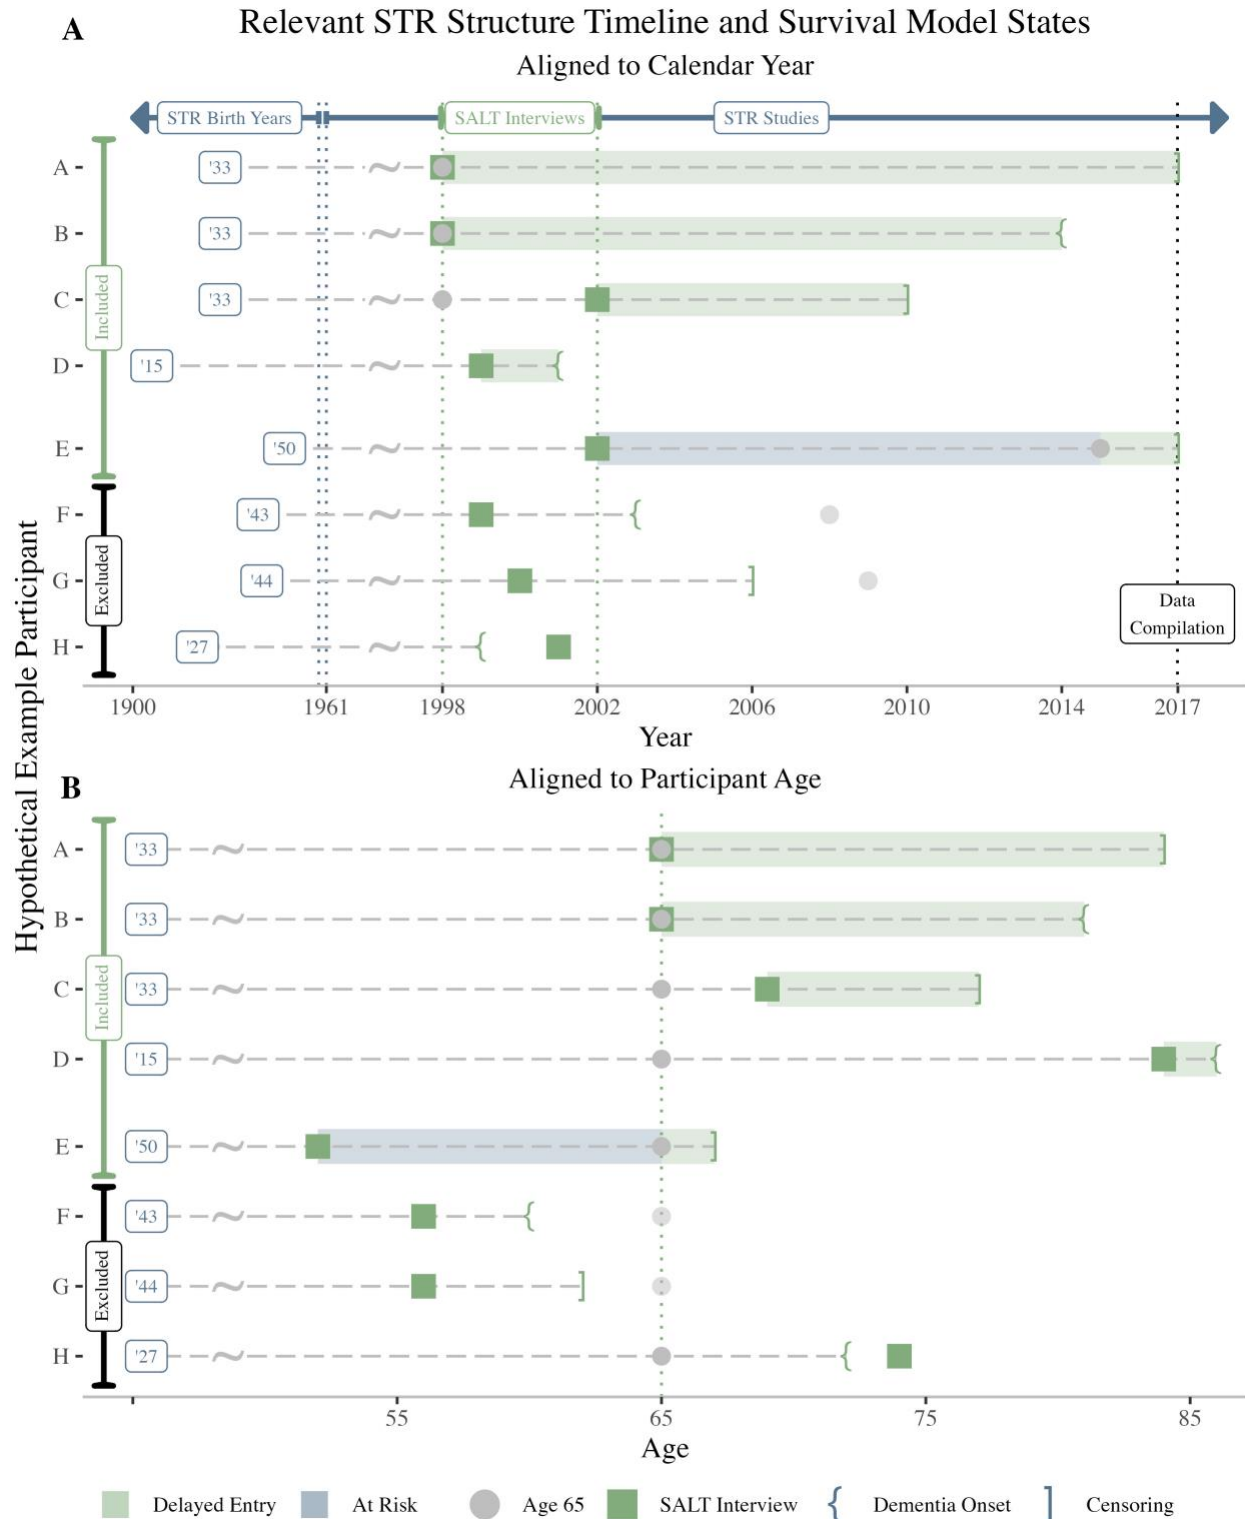

Figure 1. Graphical depiction of the Swedish Twin Registry (STR) research infrastructure, survival model states and hypothetical example individuals (HEIs) considered for inclusion current analyses. Panel A shows the HEIs aligned with the calendar year and Panel B reflects the HEIs aligned to age. HEIs A-D reflect typical entrants. That is, individuals who were 65 or older

at the time of her Screening Across the Lifespan Twin (SALT) study interview and therefore enter the 'at risk' for dementia set at the time of interview. HEI E reflects a delayed entrant. That is, an individual who was younger than 65 at the time of her SALT interview and therefore was delayed from entering the 'at risk' set until age 65. HEIs A and E were administratively censored at the time of data compilation, meaning that no evidence of dementia was observed directly through an STR study and no dementia indicators appeared in any of the National Patient Registers on or prior to December 31, 2016. HEIs B and D showed evidence of dementia during follow up, and were therefore removed from the 'at risk' set at the time of estimated dementia onset. HEI C was censored prior to data compilation and was therefore removed from the 'at risk' set at the time of death or emigration. HEIs F-H reflect STR participants that completed at least some portion of the SALT interview but were excluded from the survival analyses. HEI F and G were excluded because they experienced an event prior to age 65 (the start of time). HEI H was excluded due to dementia onset prior to the SALT interview.

## Estimated Age of Dementia Onset by National Patient Register Pseudo-Random Sample of 35 Participants Shown Per Register

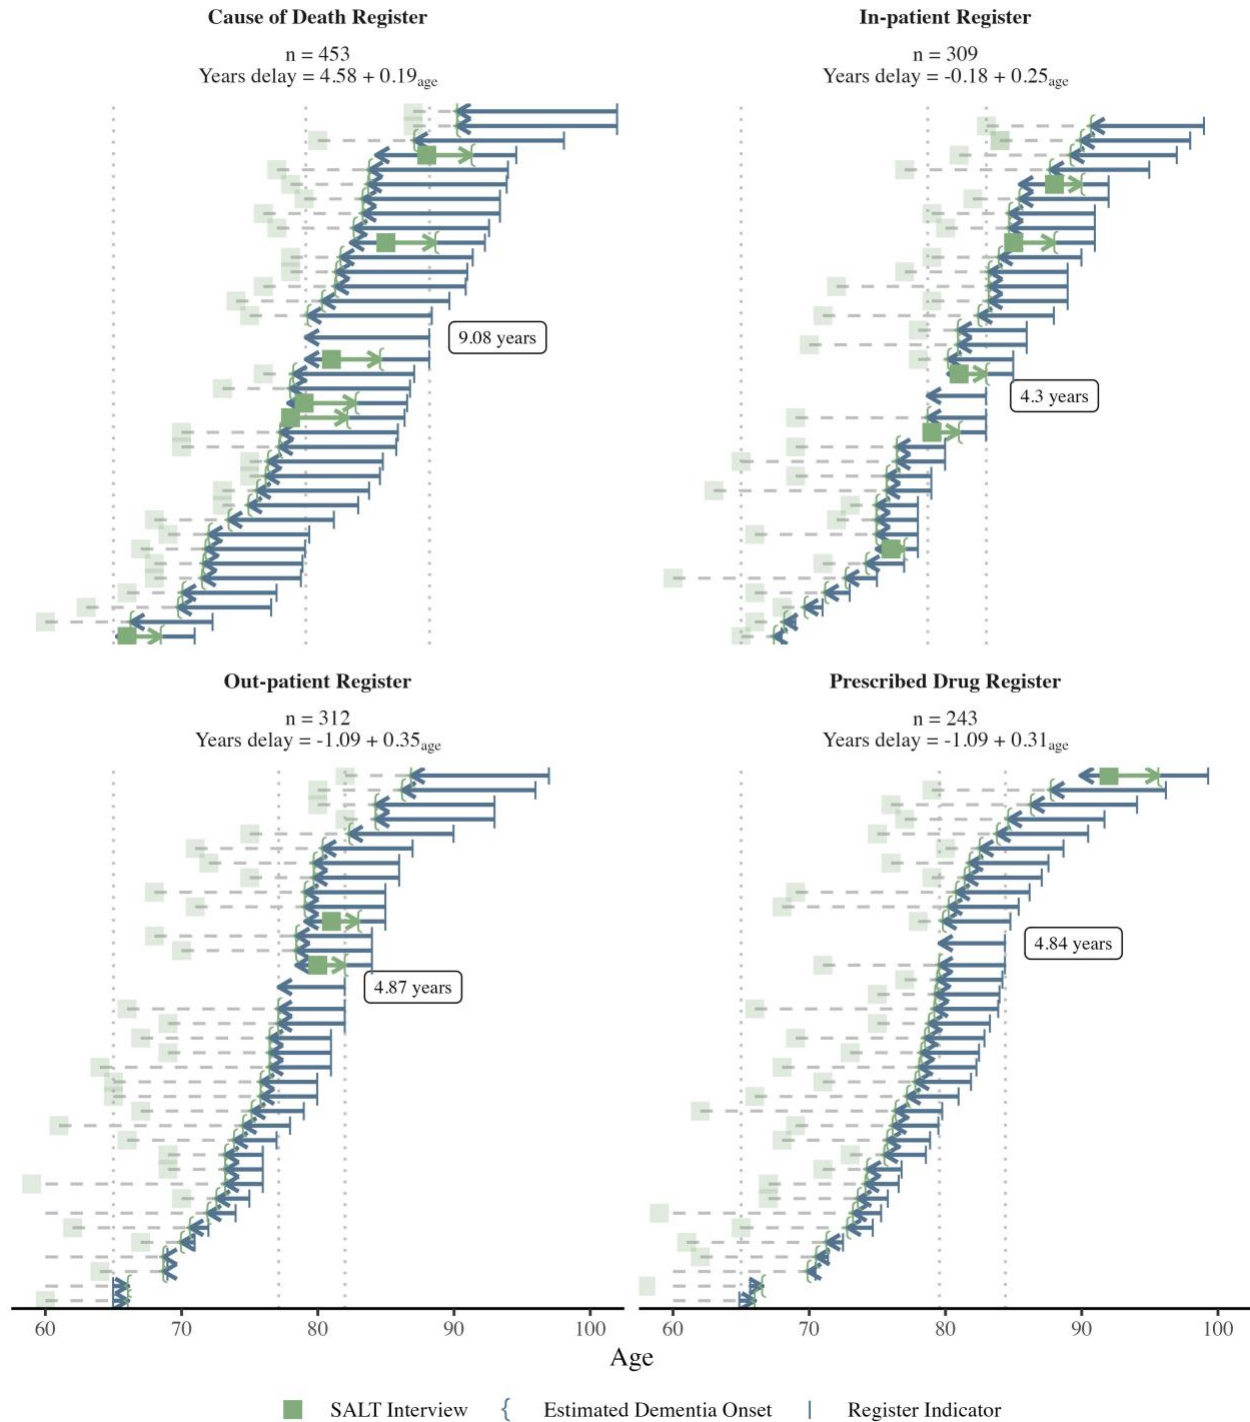

Figure 2. Estimation of age of dementia onset for female Screening Across the Lifespan Twin (SALT) participants with exclusively national patient register dementia indicators included in the primary analyses. Linear models were developed from a larger sample of all female STR participants with both a multidisciplinary clinical consensus conference (MCCC) dementia



diagnosis and one or more register indicators of dementia in order to estimate the number of years that typically elapsed between a MCCC estimated time of dementia onset and the appearance of an indicator in a given national patient register. In all registers, age of register indicator appearance was positively associated with the estimated delay and was included as a covariate in all models, centered at age 65. The mathematical median delay per register is shown by the dotted vertical lines and indicated by the arrow to the left of the label. Cases where the linear model predicted an age of onset prior to the age of SALT interview, and therefore the mid-point estimation were used are indicated by the right facing arrows. Cases where the model-estimated age of dementia onset occurred after the SALT interview but prior to age 65 were excluded.

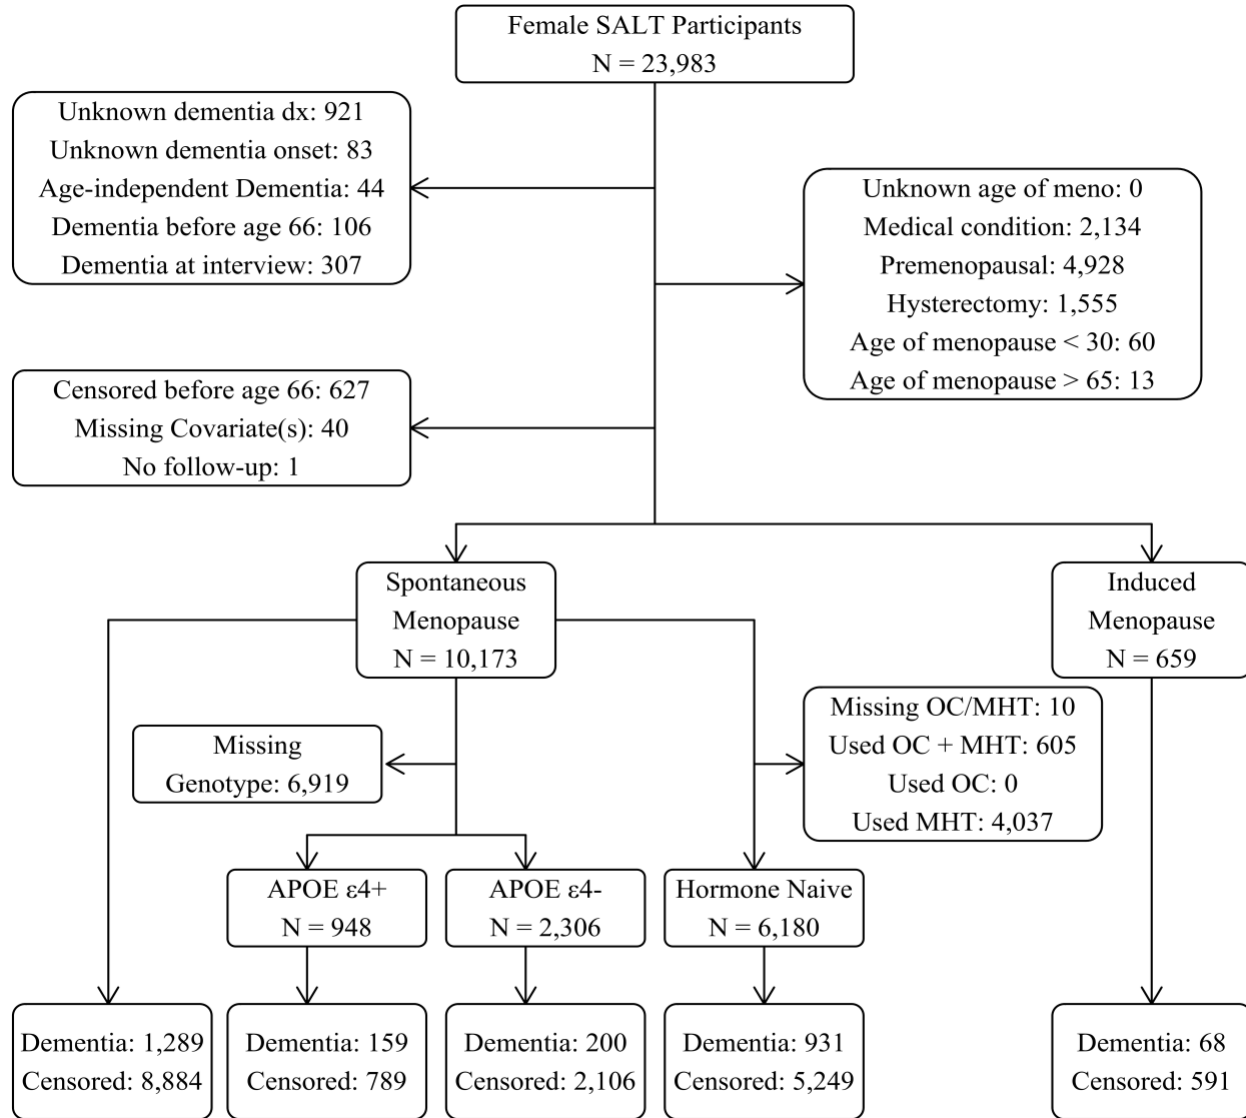

Figure 3. Participant inclusion flow chart for the primary and sensitivity analyses. OC: Oral contraceptive; MHT: Menopausal Hormone Therapy; SALT: Screening Across the Lifespan Twin Study; STR: Swedish Twin Registry.

Table 1

## Participant demographics for the spontaneous and induced menopause samples

|                          | Spontaneous Menopause |              |              |                | Induced Menopause |              |              |                |                |
|--------------------------|-----------------------|--------------|--------------|----------------|-------------------|--------------|--------------|----------------|----------------|
|                          | Total                 | Censored     | Dementia     | p <sup>a</sup> | Total             | Censored     | Dementia     | p <sup>b</sup> | p <sup>c</sup> |
| n                        | 10,173                | 8,884        | 1,289        |                | 659               | 591          | 68           |                |                |
| Years Observed           | 14.4 (4.7)            | 15.5 (3.7)   | 6.7 (3.8)    | <0.001         | 14.5 (4.6)        | 15.4 (3.8)   | 6.8 (3.6)    | <0.001         | 0.729          |
| Birth Year               |                       |              |              |                |                   |              |              |                |                |
| Age                      | 1935.7 (9.7)          | 1937.0 (9.4) | 1927.4 (7.5) | <0.001         | 1936.1 (9.5)      | 1937.1 (9.3) | 1927.5 (5.9) | <0.001         | 0.401          |
| Menopause                | 50.5 (4.0)            | 50.5 (3.9)   | 50.4 (4.5)   | 0.155          | 47.2 (6.3)        | 47.3 (6.3)   | 46.1 (6.2)   | 0.138          | <0.001         |
| SALT Interview           | 63.9 (9.0)            | 62.7 (8.7)   | 71.6 (7.4)   | <0.001         | 63.6 (8.9)        | 62.6 (8.7)   | 71.6 (5.8)   | <0.001         | 0.410          |
| Event <sup>d</sup>       | 78.3 (7.5)            | 78.3 (7.8)   | 78.3 (5.3)   | 0.754          | 78.1 (7.5)        | 78.0 (7.8)   | 78.5 (4.7)   | 0.636          | 0.439          |
| Births                   |                       |              |              | <0.001         |                   |              |              | 0.770          | 0.007          |
| 0                        | 1,287 (12.7)          | 1,099 (12.4) | 188 (14.6)   |                | 103 (15.6)        | 90 (15.2)    | 13 (19.1)    |                |                |
| 1                        | 1,624 (16.0)          | 1,383 (15.6) | 241 (18.7)   |                | 124 (18.8)        | 111 (18.8)   | 13 (19.1)    |                |                |
| 2                        | 4,063 (39.9)          | 3,645 (41.0) | 418 (32.4)   |                | 256 (38.8)        | 233 (39.4)   | 23 (33.8)    |                |                |
| 3+                       | 3,199 (31.4)          | 2,757 (31.0) | 442 (34.3)   |                | 176 (26.7)        | 157 (26.6)   | 19 (27.9)    |                |                |
| Education                |                       |              |              | <0.001         |                   |              |              | 0.300          | 0.124          |
| Primary or less          | 4,059 (39.9)          | 3,323 (37.4) | 736 (57.1)   |                | 281 (42.6)        | 248 (42.0)   | 33 (48.5)    |                |                |
| Secondary <sup>e</sup>   | 4,119 (40.5)          | 3,683 (41.5) | 436 (33.8)   |                | 269 (40.8)        | 241 (40.8)   | 28 (41.2)    |                |                |
| Post-secondary           | 1,995 (19.6)          | 1,878 (21.1) | 117 (9.1)    |                | 109 (16.5)        | 102 (17.3)   | 7 (10.3)     |                |                |
| Ever Smoker <sup>f</sup> | 3,818 (37.5)          | 3,460 (38.9) | 358 (27.8)   | <0.001         | 278 (42.2)        | 259 (43.8)   | 19 (27.9)    | 0.017          | 0.019          |
| <i>APOE</i> $\epsilon 4$ | 948 (29.1)            | 789 (27.3)   | 159 (44.3)   | <0.001         | 59 (26.0)         | 50 (24.3)    | 9 (42.9)     | 0.112          | 0.350          |

Table 1

Participant demographics for the spontaneous and induced menopause samples

|         | Spontaneous Menopause |              |            |                | Induced Menopause |            |           |                |                |
|---------|-----------------------|--------------|------------|----------------|-------------------|------------|-----------|----------------|----------------|
|         | Total                 | Censored     | Dementia   | p <sup>a</sup> | Total             | Censored   | Dementia  | p <sup>b</sup> | p <sup>c</sup> |
| MHT Use | 4,268 (42.0)          | 3,868 (43.6) | 400 (31.1) | <0.001         | 374 (56.8)        | 350 (59.2) | 24 (35.3) | <0.001         | <0.001         |
| OC Use  | 567 (6.2)             | 545 (6.8)    | 22 (1.8)   | <0.001         | 38 (6.7)          | 37 (7.4)   | 1 (1.6)   | 0.144          | 0.671          |

<sup>a</sup>Censored vs Dementia for the Spontaneous Menopause sample; <sup>b</sup>Censored vs Dementia for the Induced Menopause sample;  
<sup>c</sup>Spontaneous Menopause vs Induced Menopause samples; <sup>d</sup>Dementia or censoring; <sup>e</sup>Includes some secondary education; <sup>f</sup>Self-reported ever regularly smoking;

Note. OC: Oral contraceptive; MHT: Menopausal hormone therapy; SALT: Screening Across the Lifespan Study.

Table 2

Results of the unadjusted and adjusted Cox proportional hazards model series examining the influence of induced menopause, primary ovarian insufficiency, and early menopause

|               |        | Induced              | POI                  | Early                |
|---------------|--------|----------------------|----------------------|----------------------|
| N Events      |        | 1,357                | 1,357                | 1,357                |
| Unadjusted    |        |                      |                      |                      |
| Menopause     | HR     | 0.779                | 1.099                | 1.190                |
|               | 95% CI | 0.525 : 1.033        | 0.731 : 1.467        | 1.014 : 1.367        |
| Adjusted      |        |                      |                      |                      |
| Menopause     | HR     | <b>0.758</b>         | 1.076                | 1.151                |
|               | 95% CI | <b>0.503 : 1.014</b> | 0.704 : 1.447        | 0.974 : 1.328        |
| Menopause Age | HR     | 0.993                |                      |                      |
|               | 95% CI | 0.979 : 1.006        |                      |                      |
| Ever Smoker   | HR     | 0.961                | 0.960                | 0.958                |
|               | 95% CI | 0.837 : 1.085        | 0.836 : 1.083        | 0.834 : 1.081        |
| Education (L) | HR     | <b>0.607</b>         | <b>0.607</b>         | <b>0.608</b>         |
|               | 95% CI | <b>0.467 : 0.746</b> | <b>0.467 : 0.746</b> | <b>0.469 : 0.748</b> |
| Education (Q) | HR     | <b>0.876</b>         | <b>0.876</b>         | <b>0.876</b>         |
|               | 95% CI | <b>0.766 : 0.986</b> | <b>0.766 : 0.986</b> | <b>0.766 : 0.986</b> |
| Births (L)    | HR     | 0.887                | 0.888                | 0.892                |
|               | 95% CI | 0.763 : 1.012        | 0.764 : 1.012        | 0.768 : 1.016        |
| Births (Q)    | HR     | 1.081                | 1.083                | 1.081                |
|               | 95% CI | 0.963 : 1.200        | 0.965 : 1.202        | 0.963 : 1.200        |
| Births (C)    | HR     | <b>1.127</b>         | <b>1.124</b>         | <b>1.123</b>         |
|               | 95% CI | <b>1.013 : 1.241</b> | <b>1.010 : 1.238</b> | <b>1.009 : 1.238</b> |

Note.  $p < .10$ ;  $p < .05$ ;  $p < .01$

Table 3

Results of the unadjusted and adjusted Cox proportional hazards model series applied to the spontaneous and induced menopause samples

|                            |        | Spontaneous Menopause |                      | Induced Menopause    |               |
|----------------------------|--------|-----------------------|----------------------|----------------------|---------------|
|                            |        | Linear                | Quadratic            | Linear               | Quadratic     |
| N Events                   |        | 1,289                 |                      | 68                   |               |
| Unadjusted                 |        |                       |                      |                      |               |
| Menopause Age              | HR     | 0.992                 | <b>0.900</b>         | 0.965                | 1.002         |
|                            | 95% CI | 0.978 : 1.007         | <b>0.830 : 0.969</b> | 0.928 : 1.003        | 0.845 : 1.158 |
| Menopause Age <sup>2</sup> | HR     |                       | <b>1.003</b>         |                      | 0.999         |
|                            | 95% CI |                       | <b>1.001 : 1.004</b> |                      | 0.993 : 1.004 |
| Adjusted                   |        |                       |                      |                      |               |
| Menopause Age              | HR     | 0.996                 | <b>0.895</b>         | <b>0.960</b>         | 0.998         |
|                            | 95% CI | 0.981 : 1.011         | <b>0.826 : 0.965</b> | <b>0.918 : 1.001</b> | 0.827 : 1.168 |
| Menopause Age <sup>2</sup> | HR     |                       | <b>1.003</b>         |                      | 0.999         |
|                            | 95% CI |                       | <b>1.001 : 1.005</b> |                      | 0.993 : 1.005 |
| Ever Smoker                | HR     | 0.976                 | 0.978                | 0.705                | 0.704         |
|                            | 95% CI | 0.848 : 1.103         | 0.851 : 1.106        | 0.160 : 1.251        | 0.159 : 1.248 |
| Education (L)              | HR     | <b>0.592</b>          | <b>0.589</b>         | 0.971                | 0.995         |
|                            | 95% CI | <b>0.448 : 0.735</b>  | <b>0.445 : 0.733</b> | 0.360 : 1.582        | 0.380 : 1.610 |
| Education (Q)              | HR     | <b>0.883</b>          | <b>0.880</b>         | 0.743                | 0.756         |
|                            | 95% CI | <b>0.769 : 0.996</b>  | <b>0.767 : 0.993</b> | 0.269 : 1.217        | 0.275 : 1.237 |
| Births (L)                 | HR     | <b>0.880</b>          | <b>0.880</b>         | 1.088                | 1.073         |
|                            | 95% CI | <b>0.753 : 1.007</b>  | <b>0.752 : 1.007</b> | 0.525 : 1.651        | 0.515 : 1.631 |
| Births (Q)                 | HR     | 1.079                 | 1.079                | 1.058                | 1.084         |
|                            | 95% CI | 0.957 : 1.201         | 0.957 : 1.201        | 0.554 : 1.561        | 0.556 : 1.612 |
| Births (C)                 | HR     | <b>1.145</b>          | <b>1.143</b>         | 0.828                | 0.819         |
|                            | 95% CI | <b>1.028 : 1.262</b>  | <b>1.026 : 1.260</b> | 0.347 : 1.309        | 0.338 : 1.300 |

Note.  $p < .10$ ;  $p < .05$ ;  $p < .01$

The linear (L), quadratic (Q) and cubic (C) terms reflect the pattern of the relative change in hazard across the ordered categories but are not interpreted as typical hazard ratios.

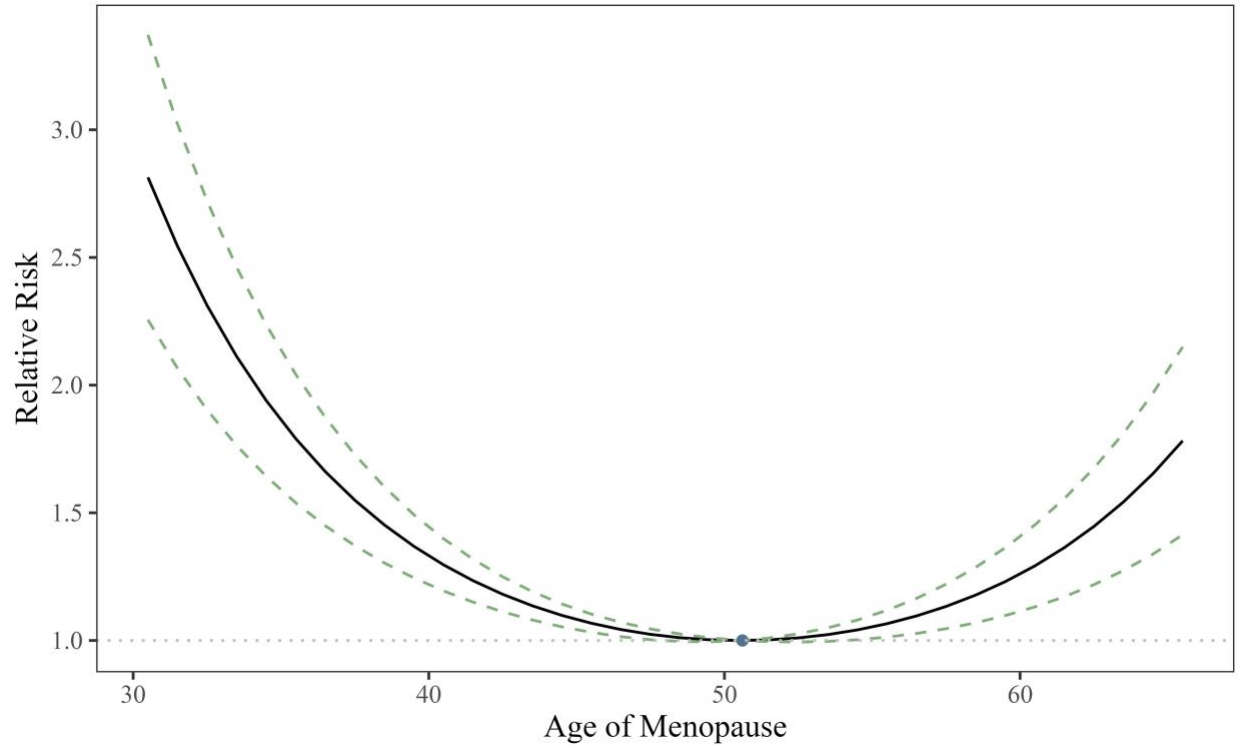

Figure 4. Relative risk of dementia by age of menopause (AOM) as predicted by the unadjusted quadratic model. Risk of dementia is shown relative to the predicted risk for a woman with the sample mean age of menopause (illustrated by the single point). The model indicates that a woman who experienced menopause at age 31 has more than 2.5 times the risk of developing dementia compared to a woman with an average age of menopause. Similarly, a woman experiencing menopause at age 64 has almost 2 times greater risk of developing dementia compared to a woman with an average age of menopause across follow-up.

Table 4

Results of the unadjusted and adjusted Cox proportional hazards model series applied to the APOE  $\epsilon 4+$  and APOE  $\epsilon 4-$  samples using delayed entry with age as time scale.

|                            |        | <i>APOE <math>\epsilon 4+</math></i> |                      | <i>APOE <math>\epsilon 4-</math></i> |                      |
|----------------------------|--------|--------------------------------------|----------------------|--------------------------------------|----------------------|
|                            |        | Linear                               | Quadratic            | Linear                               | Quadratic            |
| N Events                   |        | 159                                  |                      | 200                                  |                      |
| Unadjusted                 |        |                                      |                      |                                      |                      |
| Menopause Age              | HR     | 1.011                                | <i>0.840</i>         | 0.975                                | 0.896                |
|                            | 95% CI | 0.967 : 1.054                        | <i>0.633 : 1.047</i> | 0.940 : 1.010                        | 0.752 : 1.040        |
| Menopause Age <sup>2</sup> | HR     |                                      | <i>1.005</i>         |                                      | 1.002                |
|                            | 95% CI |                                      | <i>0.999 : 1.010</i> |                                      | 0.998 : 1.006        |
| Adjusted                   |        |                                      |                      |                                      |                      |
| Menopause Age              | HR     | 1.009                                | <i>0.832</i>         | 0.983                                | <i>0.881</i>         |
|                            | 95% CI | 0.965 : 1.053                        | <i>0.623 : 1.040</i> | 0.947 : 1.019                        | <i>0.735 : 1.027</i> |
| Menopause Age <sup>2</sup> | HR     |                                      | <i>1.005</i>         |                                      | 1.003                |
|                            | 95% CI |                                      | <i>0.999 : 1.010</i> |                                      | 0.999 : 1.007        |
| Ever Smoker                | HR     | 1.243                                | 1.282                | 0.806                                | 0.817                |
|                            | 95% CI | 0.900 : 1.586                        | 0.938 : 1.626        | 0.457 : 1.155                        | 0.468 : 1.167        |
| Education (L)              | HR     | <i>0.747</i>                         | 0.756                | <b>0.571</b>                         | <b>0.563</b>         |
|                            | 95% CI | <i>0.413 : 1.082</i>                 | 0.418 : 1.093        | <b>0.222 : 0.920</b>                 | <b>0.210 : 0.916</b> |
| Education (Q)              | HR     | 0.982                                | 0.977                | <i>0.779</i>                         | <i>0.772</i>         |
|                            | 95% CI | 0.692 : 1.272                        | 0.686 : 1.268        | <i>0.504 : 1.054</i>                 | <i>0.495 : 1.049</i> |
| Births (L)                 | HR     | 1.164                                | 1.199                | <b>0.702</b>                         | <b>0.696</b>         |
|                            | 95% CI | 0.778 : 1.549                        | 0.813 : 1.585        | <b>0.399 : 1.005</b>                 | <b>0.392 : 1.000</b> |
| Births (Q)                 | HR     | 1.210                                | 1.205                | 1.283                                | 1.296                |
|                            | 95% CI | 0.832 : 1.588                        | 0.825 : 1.585        | 0.972 : 1.594                        | 0.983 : 1.610        |
| Births (C)                 | HR     | 1.155                                | 1.141                | 0.845                                | 0.853                |
|                            | 95% CI | 0.778 : 1.531                        | 0.765 : 1.517        | 0.536 : 1.154                        | 0.543 : 1.163        |

Note.  $p < .10$ ;  $p < .05$ ;  $p < .01$
